# Supplementary material for: The C terminus of HspA—a potential target for native Ni(ii) and Bi(iii) anti-ulcer drugs
Source: Royal Society of Chemistry journal article supplement (doi:10.1039/c0dt00013b), 2010-01-01
Supplement: c0dt00013b.pdf [file c0dt00013b.pdf]

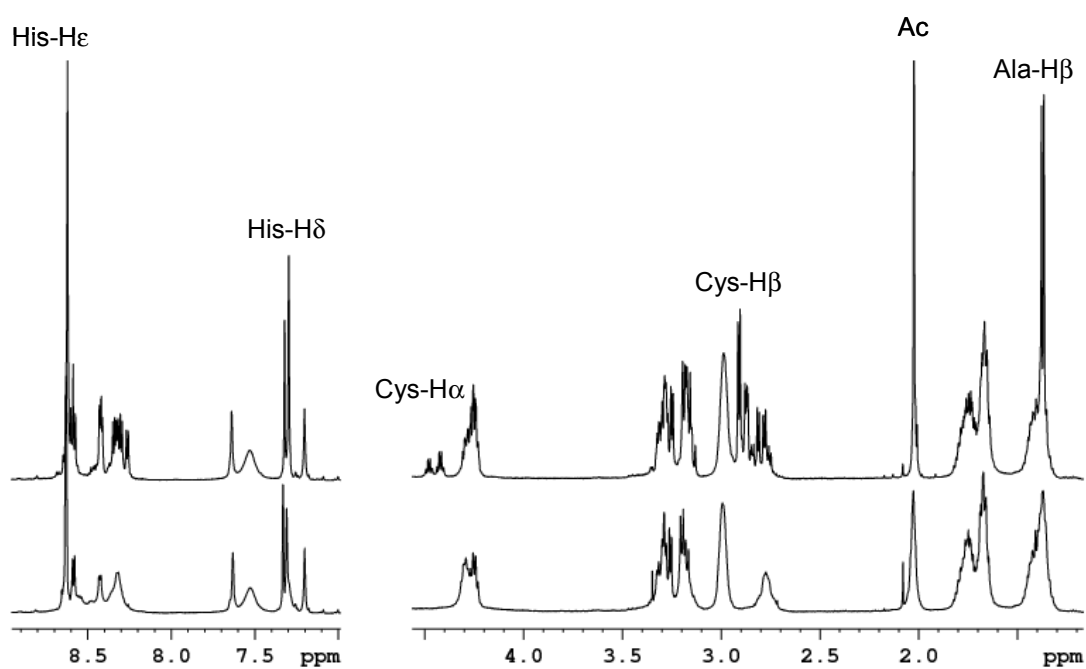

Fig1S. 1D  $^1\text{H}$  NMR spectra of Ac Ac-ACCHDHKKH-NH<sub>2</sub> 3.0 mM, T=298 K, pH 2.5. Free ligand (upper trace); ligand in presence of 0.5 Bi(III) equivalent (lower trace).

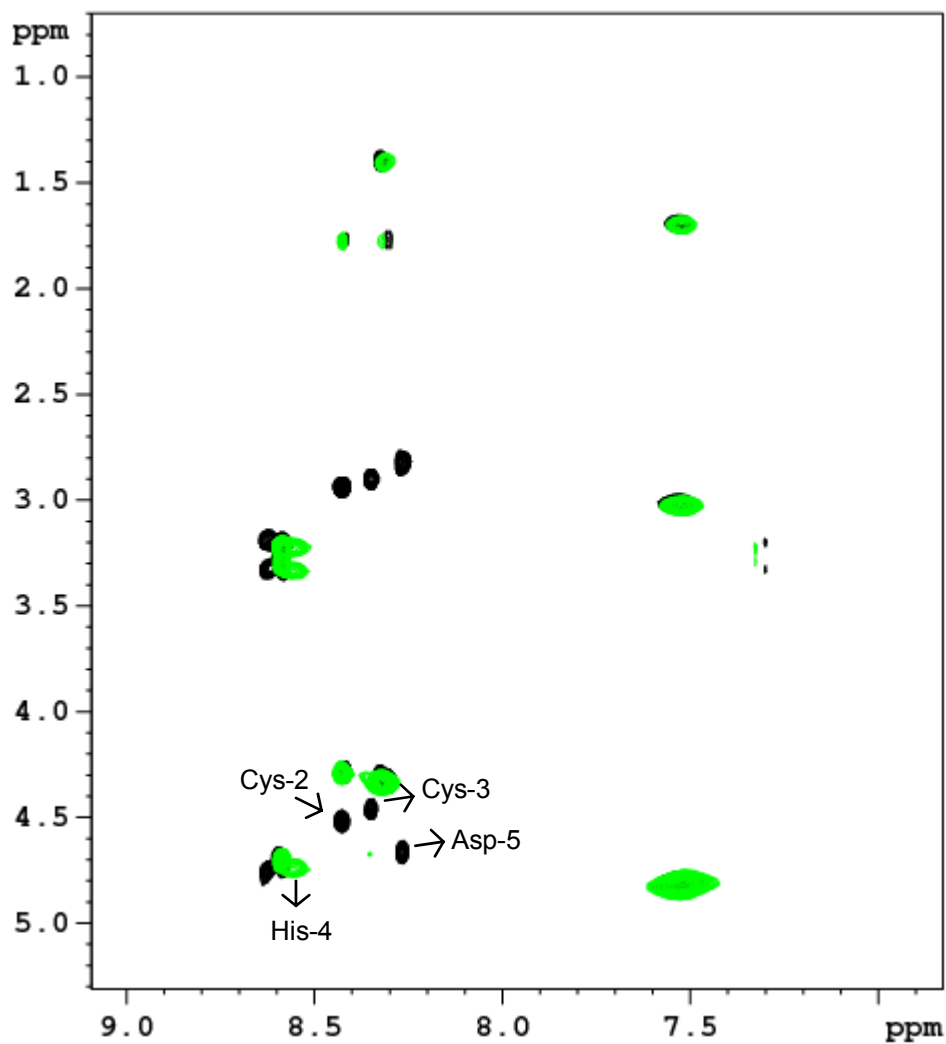

Fig. 2S. Fingerprint region of  $^1\text{H}$ - $^1\text{H}$  TOCSY spectra of Ac-ACCHDHKKH-NH<sub>2</sub> 3.0 mM, T=298 K, pH 2.5 in absence (black contours) and in presence of 0.5 Bi(III) eqs.(green contours)

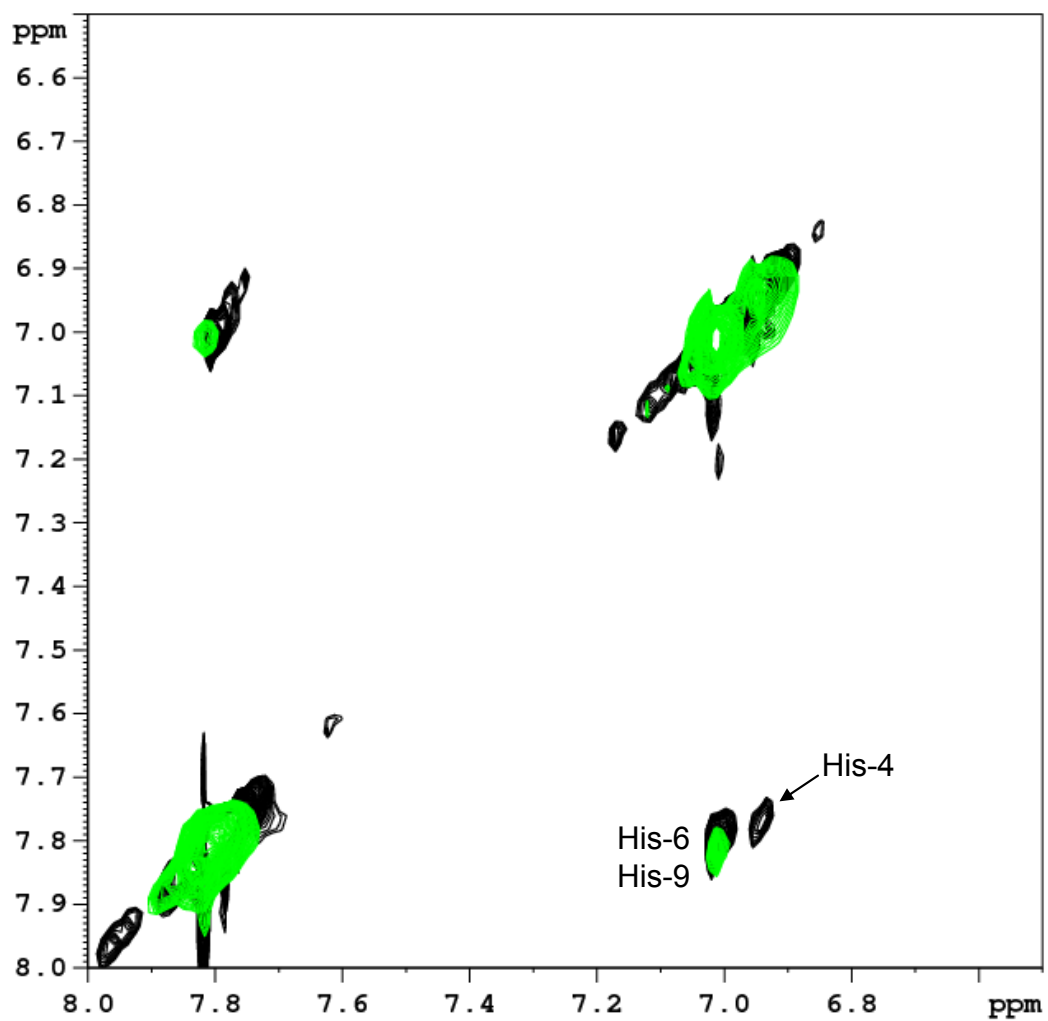

Fig. 3S. Aromatic region of  $^1\text{H}$ - $^1\text{H}$  TOCSY spectra of Ac-ACCHDHKKH-NH<sub>2</sub> 3.0 mM, T=298 K, pH 7.0 in absence (black contours) and in presence of 0.5 Bi(III) eqs.(green contours)
